# Supplementary material for: Synthesis and In Vitro Characterization of Glycopeptide Drug Candidates Related to PACAP1–23
Source: Molecules. 2021 Aug 14;26(16):4932. doi: 10.3390/molecules26164932 (PMC8401035; doi:10.3390/molecules26164932)
Supplement: Supplementary file 1 [file molecules-26-04932-s001.zip › molecules-1330908-SI.pdf]

# *Supplemental Information*

## Synthesis and *In Vitro* Characterization of Glycopeptide Drug Candidates Related to PACAP<sub>1–23</sub>

Christopher R. Apostol<sup>1</sup>, Parthasaradhireddy Tanguturi<sup>3</sup>, Lajos Z. Szabò<sup>1</sup>, Daniel Varela<sup>2</sup>, Thiago Gilmartin<sup>2</sup>, John M. Streicher<sup>3</sup>, and Robin Polt<sup>1\*</sup>

<sup>1</sup> Department of Chemistry and Biochemistry, BIO5, The University of Arizona, 1306 E. University Blvd, Tucson, AZ 85721; [caposto1@email.arizona.edu](mailto:caposto1@email.arizona.edu)

<sup>2</sup> Facultat de Química Tarragona, Universitat Rovira I Virgili, Barcelona, Spain

<sup>3</sup> Department of Pharmacology, College of Medicine, The University of Arizona, 1501 N. Campbell Ave, Tucson, AZ 85724

\* [polt@u.arizona.edu](mailto:polt@u.arizona.edu); +01 (520) 370-2654

### Glycopeptide Yields

| Compound        | Yield on 0.25 mmol scale (mg) | %Yield |
|-----------------|-------------------------------|--------|
| CRA_DV_3022 (1) | 25.7                          | 3.6    |
| CRA_DV_3023 (2) | 23.5                          | 3.1    |
| CRA_DV_3024 (3) | 7.7                           | 0.9    |
| CRA_TG_3025 (4) | 36                            | 4.5    |
| CRA_TG_3026 (5) | 19.7                          | 2.5    |
| CRA_TG_3027 (6) | 31.2                          | 3.9    |

# Analytical HPLC Data

## CRA\_DV 3022 (1)

Data File: c:\star\data\chris a\pacap 23mers\23mers  
 Channel: 2 = 280.00 nm RESULTS  
 Sample ID: CRA\_DV\_3022 pure  
 Operator (Inj): polt lab  
 Injection Date: 04/26/2021 04:16:13 PM  
 Injection Method: c:\star\method\lajos\chris30min.mth  
 Run Time (min): 37.013  
 Workstation:  
 Instrument (Inj): varian

Operator (Calc): polt lab  
 Calc Date: 04/26/2021 05:14:19  
 Times Calculated: 2  
 Calculation Method: c:\docume~1\poltlab\locals~1\temp\~2ls1  
 Instrument (Calc): varian  
 Run Mode: Analysis  
 Peak Measurement: Peak Area  
 Calculation Type: Percent  
 Calibration Level: N/A  
 Verification Tolerance: N/A

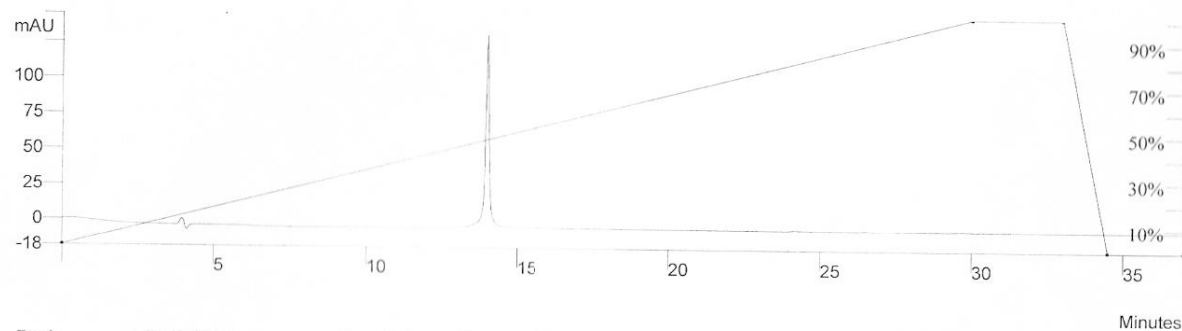

| Peak No | Peak Name | Result () | Ret. Time (min) | Time Offset (min) | Area (counts) | Rel Ret Time | Sep. Code | Width 1/2 (sec) | Status Codes | Group |
|---------|-----------|-----------|-----------------|-------------------|---------------|--------------|-----------|-----------------|--------------|-------|
| 1       |           | 100.0000  | 13.984          | 0.000             | 6515282       | 0.00         | BB        | 7.0             |              | 0     |
| Totals  |           | 100.0000  |                 | 0.000             | 6515282       |              |           |                 |              |       |

## CRA\_DV 3023 (2)

Data File: c:\star\data\chris a\pacap 23mers\23mers  
 Channel: 2 = 280.00 nm RESULTS  
 Sample ID: CRA\_DV\_3023 pure  
 Operator (Inj): polt lab  
 Injection Date: 04/26/2021 04:56:34 PM  
 Injection Method: c:\star\method\lajos\chris30min.mth  
 Run Time (min): 37.013  
 Workstation:  
 Instrument (Inj): varian

Operator (Calc): polt lab  
 Calc Date: 04/27/2021 09:59:52  
 Times Calculated: 2  
 Calculation Method: c:\docume~1\poltlab\locals~1\temp\~2ls1  
 Instrument (Calc): varian  
 Run Mode: Analysis  
 Peak Measurement: Peak Area  
 Calculation Type: Percent  
 Calibration Level: N/A  
 Verification Tolerance: N/A

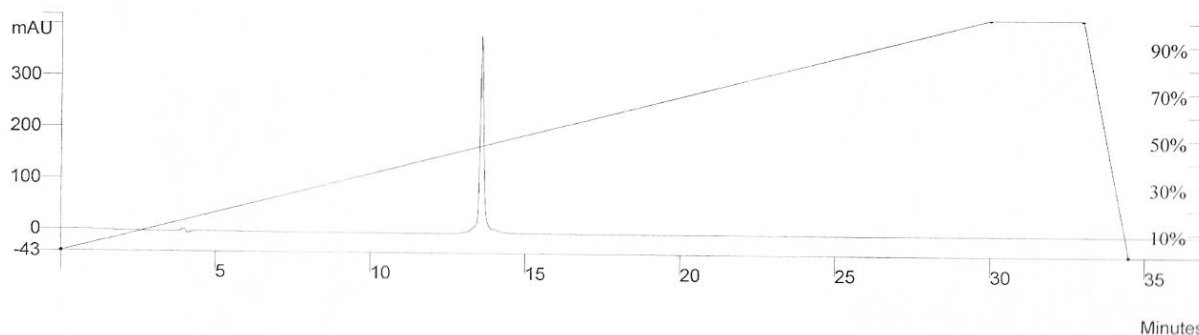

| Peak No | Peak Name | Result () | Ret. Time (min) | Time Offset (min) | Area (counts) | Rel Ret Time | Sep. Code | Width 1/2 (sec) | Status Codes | Group |
|---------|-----------|-----------|-----------------|-------------------|---------------|--------------|-----------|-----------------|--------------|-------|
| 1       |           | 100.0000  | 13.595          | 0.000             | 18338214      | 0.00         | BB        | 7.2             |              | 0     |
| Totals  |           | 100.0000  |                 | 0.000             | 18338214      |              |           |                 |              |       |

# CRA\_DV 3024 (3)

|                   |                                          |                         |                                         |
|-------------------|------------------------------------------|-------------------------|-----------------------------------------|
| Data File:        | c:\star\data\chris a\pacap 23mers\23mers | Operator (Calc):        | polt lab                                |
| Channel:          | 2 = 280.00 nm RESULTS                    | Calc Date:              | 04/27/2021 10:00:37                     |
| Sample ID:        | CRA_DV_3024 pure                         | Times Calculated:       | 2                                       |
| Operator (Inj):   | polt lab                                 | Calculation Method:     | c:\docume~1\poltlab\locals~1\temp\~2\sl |
| Injection Date:   | 04/26/2021 06:17:15 PM                   | Instrument (Calc):      | varian                                  |
| Injection Method: | c:\star\method\lajos\chris30min.mth      | Run Mode:               | Analysis                                |
| Run Time (min):   | 37.013                                   | Peak Measurement:       | Peak Area                               |
| Workstation:      |                                          | Calculation Type:       | Percent                                 |
| Instrument (Inj): | varian                                   | Calibration Level:      | N/A                                     |
|                   |                                          | Verification Tolerance: | N/A                                     |

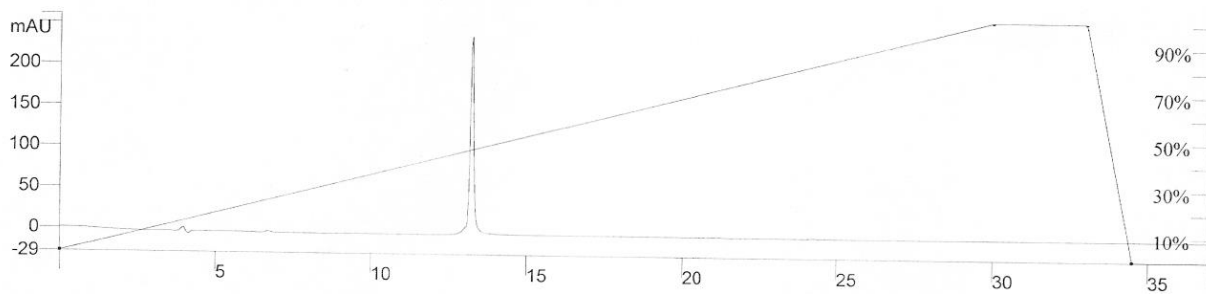

| Peak No | Peak Name | Result () | Ret. Time (min) | Time Offset (min) | Area (counts) | Rel Ret Time | Sep. Code | Width 1/2 (sec) | Status Codes | Group |
|---------|-----------|-----------|-----------------|-------------------|---------------|--------------|-----------|-----------------|--------------|-------|
| 1       |           | 100.0000  | 13.235          | 0.000             | 10758523      | 0.00         | BB        | 7.0             |              | 0     |
| Totals  |           | 100.0000  |                 | 0.000             | 10758523      |              |           |                 |              |       |

## CRA\_TG 3025 (4)

Data File: c:\star\data\chris a\pacap 23mers\23mers  
 Channel: 2 = 280.00 nm RESULTS  
 Sample ID: CRA\_TG\_3025 pure  
 Operator (Inj): polt lab  
 Injection Date: 04/26/2021 12:54:31 PM  
 Injection Method: c:\star\method\lajos\chris30min.mth  
 Run Time (min): 37.013  
 Workstation:  
 Instrument (Inj): varian

Operator (Calc): polt lab  
 Calc Date: 04/26/2021 02:05:20  
 Times Calculated: 2  
 Calculation Method: c:\docume~1\poltlab\locals~1\temp\~cra  
 Instrument (Calc): varian  
 Run Mode: Analysis  
 Peak Measurement: Peak Area  
 Calculation Type: Percent  
 Calibration Level: N/A  
 Verification Tolerance: N/A

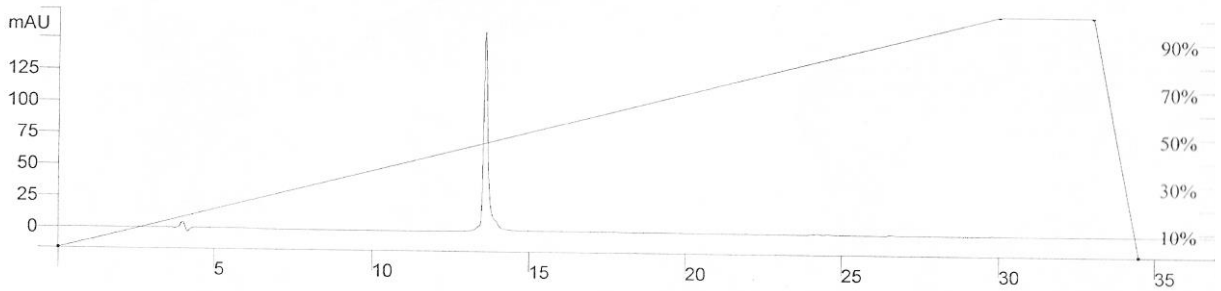

| Peak No | Peak Name | Result (%) | Ret. Time (min) | Time Offset (min) | Area (counts) | Rel Ret Time | Sep. Code | Width 1/2 (sec) | Status Codes | Group |
|---------|-----------|------------|-----------------|-------------------|---------------|--------------|-----------|-----------------|--------------|-------|
| 1       |           | 100.0000   | 13.587          | 0.000             | 8293504       | 0.00         | BB        | 7.8             |              | 0     |
| Totals  |           | 100.0000   |                 | 0.000             | 8293504       |              |           |                 |              |       |

## CRA\_TG 3026 (5)

Data File: c:\star\data\chris a\pacap 23mers\23mers  
 Channel: 2 = 280.00 nm RESULTS  
 Sample ID: CRA\_TG\_3026 pure  
 Operator (Inj): polt lab  
 Injection Date: 04/26/2021 01:34:52 PM  
 Injection Method: c:\star\method\lajos\chris30min.mth  
 Run Time (min): 37.013  
 Workstation:  
 Instrument (Inj): varian

Operator (Calc): polt lab  
 Calc Date: 04/26/2021 02:22:18  
 Times Calculated: 2  
 Calculation Method: c:\docume~1\poltlab\locals~1\temp\~cra  
 Instrument (Calc): varian  
 Run Mode: Analysis  
 Peak Measurement: Peak Area  
 Calculation Type: Percent  
 Calibration Level: N/A  
 Verification Tolerance: N/A

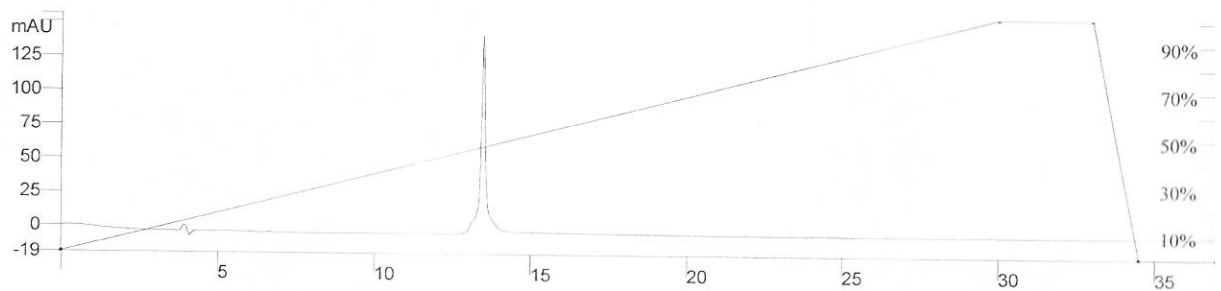

| Peak No | Peak Name | Result (%) | Ret. Time (min) | Time Offset (min) | Area (counts) | Rel Ret Time | Sep. Code | Width 1/2 (sec) | Status Codes | Group |
|---------|-----------|------------|-----------------|-------------------|---------------|--------------|-----------|-----------------|--------------|-------|
| 1       |           | 100.0000   | 13.477          | 0.000             | 8895272       | 0.00         | BB        | 8.0             |              | 0     |
| Totals  |           | 100.0000   |                 | 0.000             | 8895272       |              |           |                 |              |       |

## CRA\_TG 3027 (6)

Data File: c:\star\data\chris a\pacap 23mers\23mers  
 Channel: 2 = 280.00 nm RESULTS  
 Sample ID: CRA\_TG\_3027 pure  
 Operator (Inj): polt lab  
 Injection Date: 04/26/2021 02:15:13 PM  
 Injection Method: c:\star\method\lajos\chris30min.mth  
 Run Time (min): 37.013  
 Workstation:  
 Instrument (Inj): varian

Operator (Calc): polt lab  
 Calc Date: 04/26/2021 02:58:34  
 Times Calculated: 2  
 Calculation Method: c:\docume~1\poltlab\locals~1\temp\~cra\_  
 Instrument (Calc): varian  
 Run Mode: Analysis  
 Peak Measurement: Peak Area  
 Calculation Type: Percent  
 Calibration Level: N/A  
 Verification Tolerance: N/A

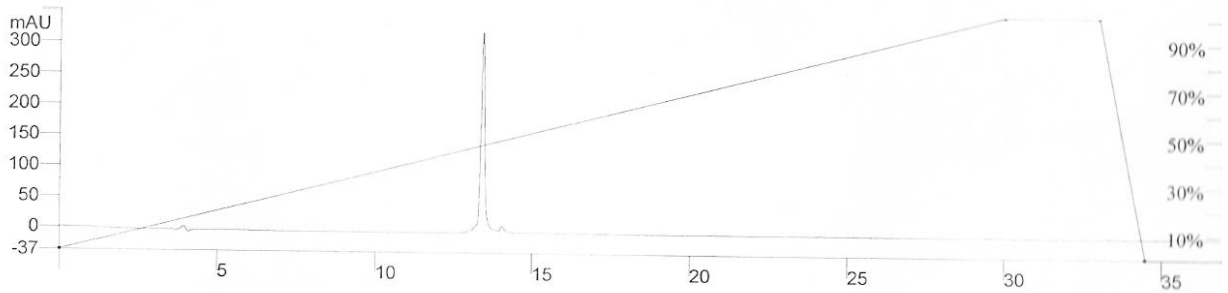

| Peak No | Peak Name | Result () | Ret. Time (min) | Time Offset (min) | Area (counts) | Rel Ret Time | Sep. Code | Width 1/2 (sec) | Status Codes | Group |
|---------|-----------|-----------|-----------------|-------------------|---------------|--------------|-----------|-----------------|--------------|-------|
| 1       |           | 97.8103   | 13.424          | 0.000             | 15267866      | 0.00         | BB        | 7.2             |              | 0     |
| 2       |           | 2.1897    | 14.045          | 0.000             | 341804        | 0.00         | TS        | 0.0             |              | 0     |
| Totals  |           | 100.0000  |                 | 0.000             | 15609670      |              |           |                 |              |       |

## Mass Spectra

### CRA\_DV 3022 (1)

#### Generic Display Report

**Analysis Info**  
 Analysis Name: D:\Data\2021\_04\CRA-4110540\CRA\_DV\_3022\_02.d  
 Method: Tuning Mix.m  
 Sample Name: CRA\_DV\_3022  
 Comment: Dissolved in 200 ul 50%ACN, then 2x dil with 50%ACN and a few drops of 0.3%FA  
 Acquisition Date: 4/28/2021 3:47:01 PM  
 Operator: KK  
 Instrument: amaZon SL

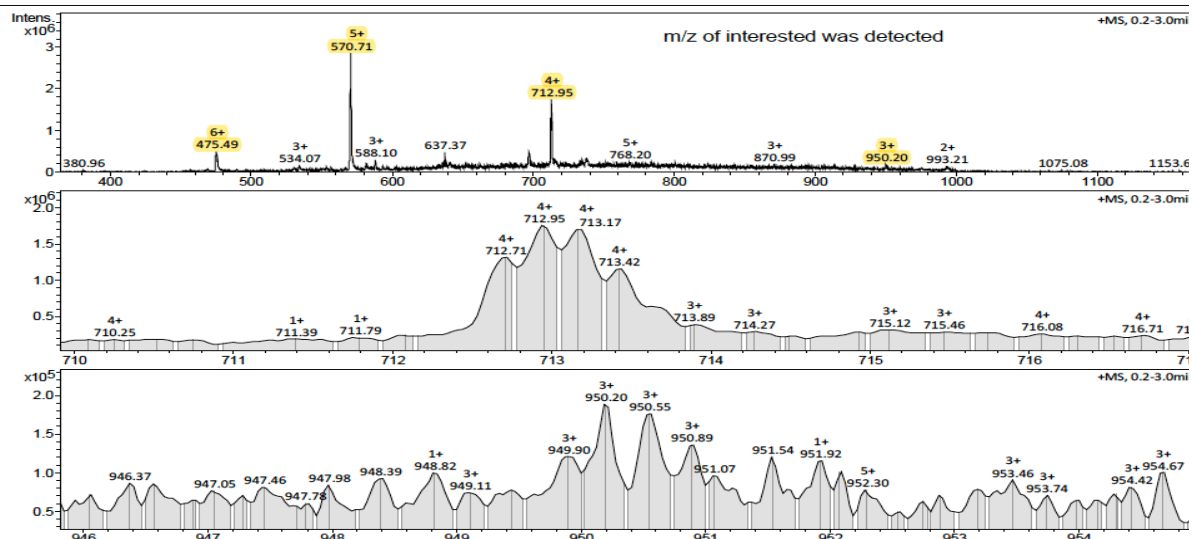

# CRA\_DV 3023 (2)

## Generic Display Report

|                      |                                                                                          |                  |                      |
|----------------------|------------------------------------------------------------------------------------------|------------------|----------------------|
| <b>Analysis Info</b> |                                                                                          | Acquisition Date | 4/28/2021 4:20:13 PM |
| Analysis Name        | D:\Data\2021_04\CRA-4110540\CRA_CRA_DV_3023.d                                            | Operator         | KK                   |
| Method               | Tuning Mix.m                                                                             | Instrument       | amaZon SL            |
| Sample Name          | CRA_DV_3023                                                                              |                  |                      |
| Comment              | Dissolved in 200 ul 50%ACN, then 2x dil with 50%ACN and a few drops of 0.3%FA. Ultrascan |                  |                      |

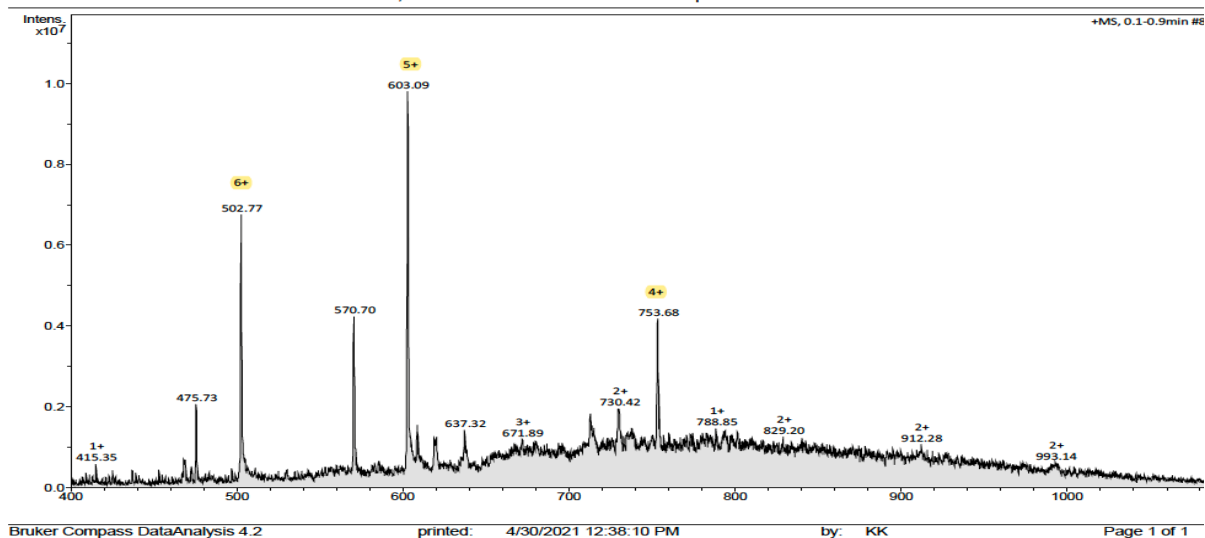

# CRA\_DV 3024 (3)

CRA-4110540 CRA\_DV\_3024 wFA 4/30/2021 10:20:32 AM CRA-4110540  
Dissolved in 200ul 50%ACN, then 2x with 50%ACN+2 drops of 0.3%FA  
CRA-4110540 CRA\_DV\_3024 wFA #1-15 RT: 0.01-0.20 AV: 15 NL: 5.21E6  
T: FTMS + p ESI Full ms [300.00-2000.00]

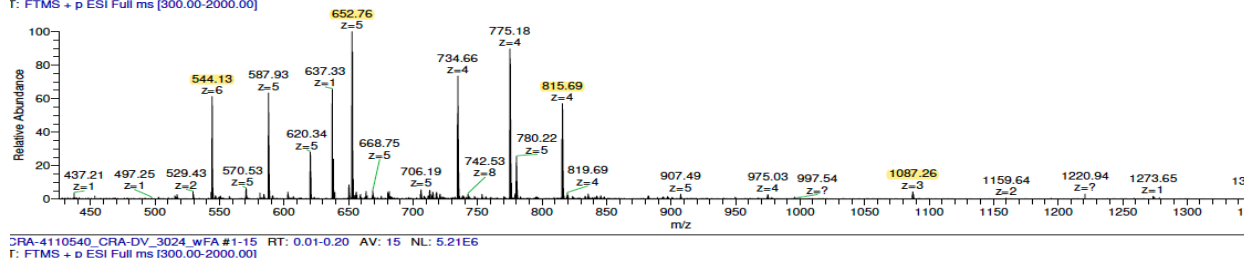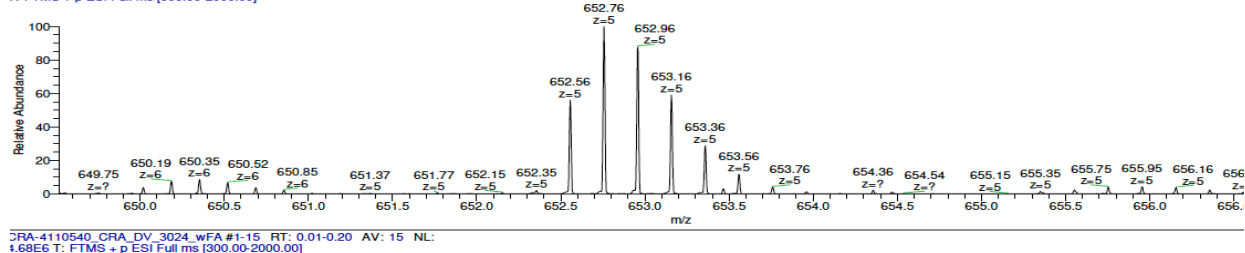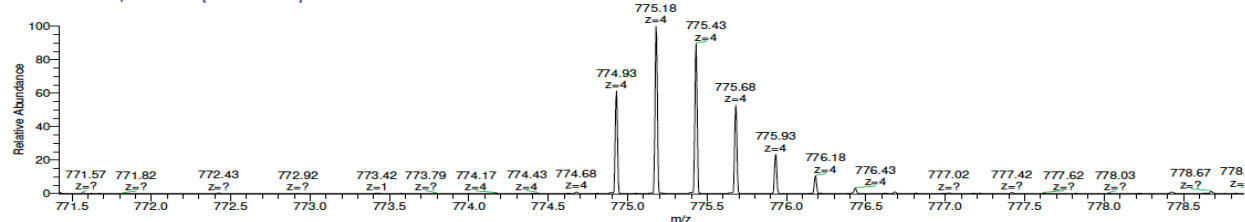

# CRA\_TG 3025 (4)

G:\Xcalibur\Data\CRA-4110540\_CRA\_TG\_3025

4/30/2021 10:46:11 AM

CRA\_TG\_3025

Dissolved in 200ul 50%ACN, then 2x with 50%ACN+2 drops of 0.3%FA

CRA-4110540\_CRA\_TG\_3025 #3-98 RT: 0.04-1.34 AV: 96 NL: 5.45E6

F: FTMS + p ESI Full ms [300.00-2000.00]

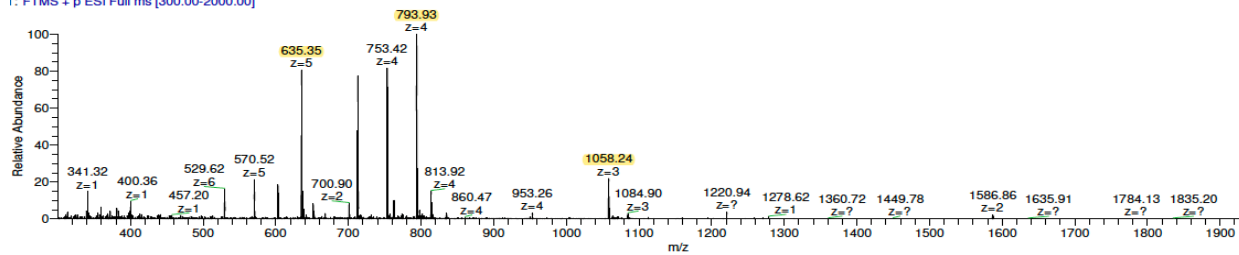

CRA-4110540\_CRA\_TG\_3025 #3-98 RT: 0.04-1.34 AV: 96 NL: 1.19E6

F: FTMS + p ESI Full ms [300.00-2000.00]

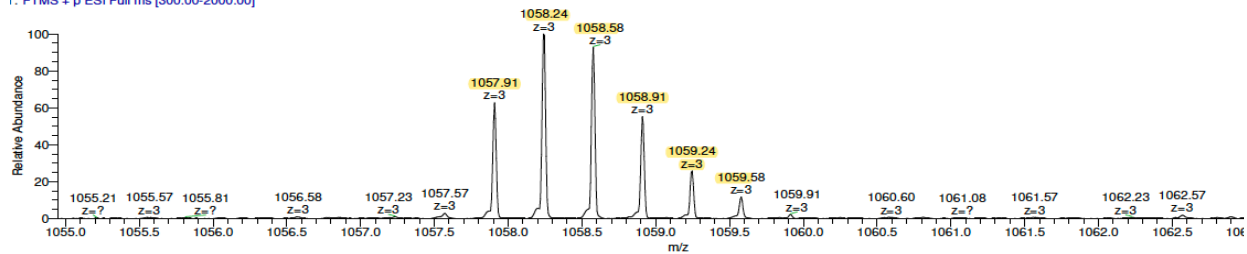

CRA-4110540\_CRA\_TG\_3025 #3-98 RT: 0.04-1.34 AV: 96 NL: 5.45E6

F: FTMS + p ESI Full ms [300.00-2000.00]

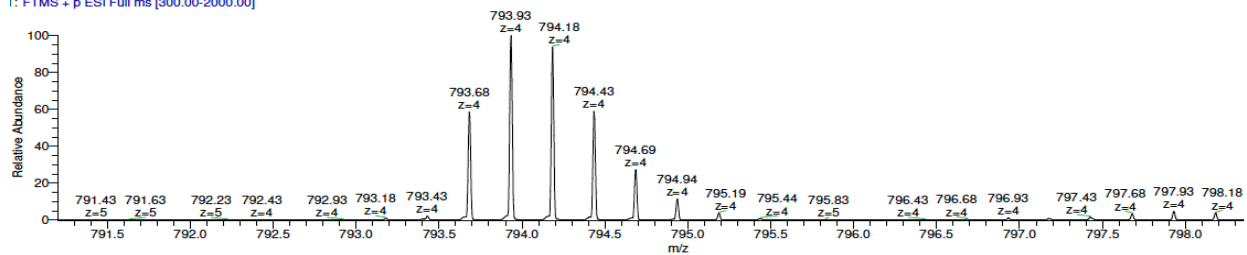

# CRA\_TG 3026 (5)

CRA-4110540\_CRA\_TG\_3026\_210430115728

4/30/2021 11:58:56 AM

CRA\_TG\_3026\_ITMS

Dissolved in 200ul 50%ACN+2 drops of 0.3%FA, ITMS

CRA-4110540\_CRA\_TG\_3026\_210430115728 #25-583 RT: 0.07-1.59 AV: 559 NL: 3.36E5  
T: ITMS + p ESI Full ms [300.00-2000.00]

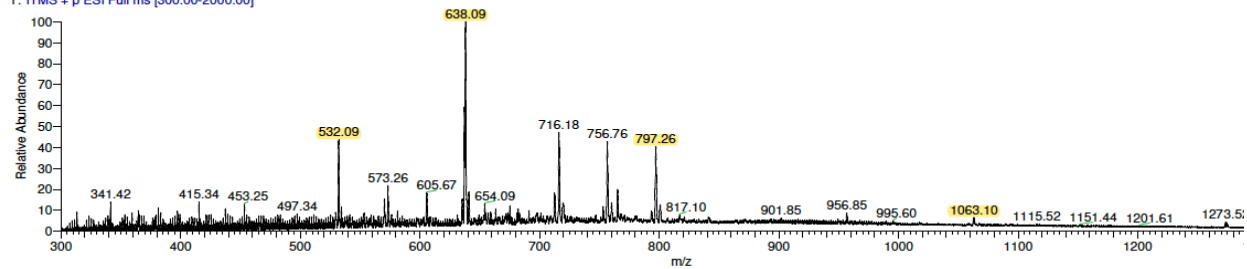

C141H221N37O47 +H: C141 H226 N37 O47 pa Chrg 5

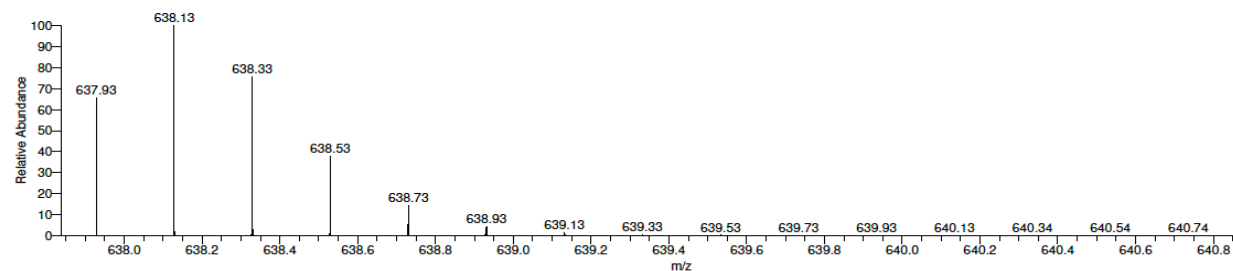

C141H221N37O47 +H: C141 H227 N37 O47 pa Chrg 6

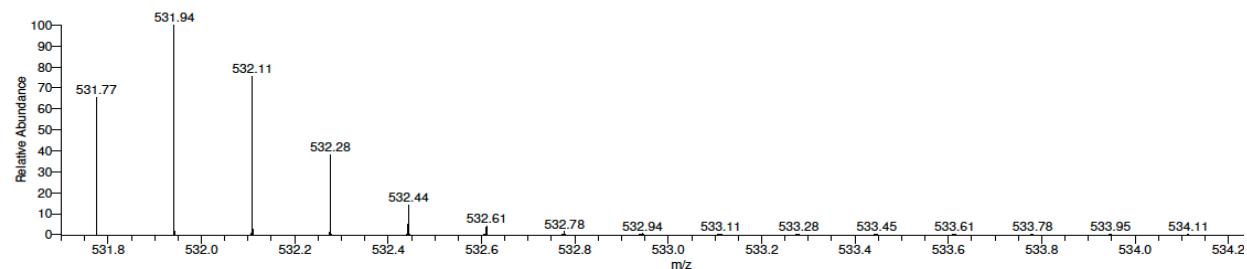

# CRA\_TG 3027 (6)

G:\Xcalibur\Data\CRA-4110540\_CRA\_TG\_3027

4/30/2021 11:42:25 AM

CRA\_TG\_3027

Dissolved in 200ul 50%ACN+2 drops of 0.3%FA, ITMS

CRA-4110540\_CRA\_TG\_3027 #5-338 RT: 0.01-0.91 AV: 334 NL: 2.29E6

F: ITMS + p ESI Full ms [300.00-2000.00]

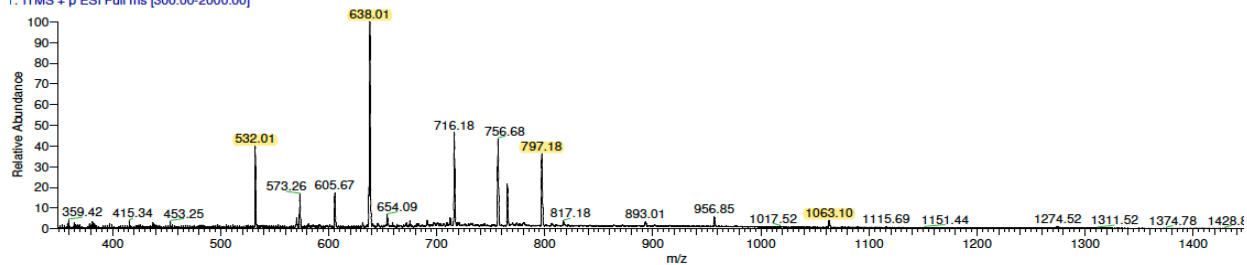

141H221N37O47 +H: C141 H226 N37 O47 pa Chrg 5

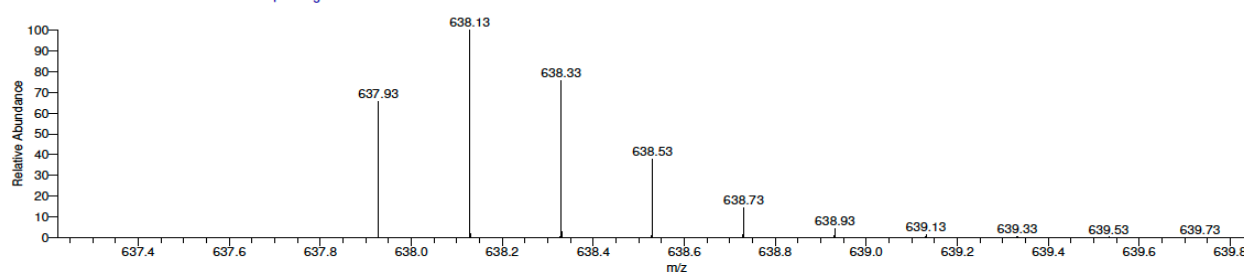

141H221N37O47 +H: C141 H227 N37 O47 pa Chrg 6

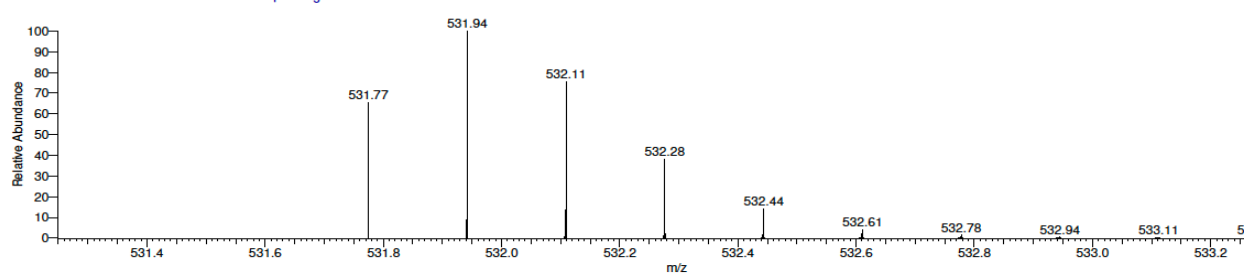

## In Vitro cAMP Accumulation

### CRA\_DV\_3022,3023 &3024 on PAC1-CHO; Agonist

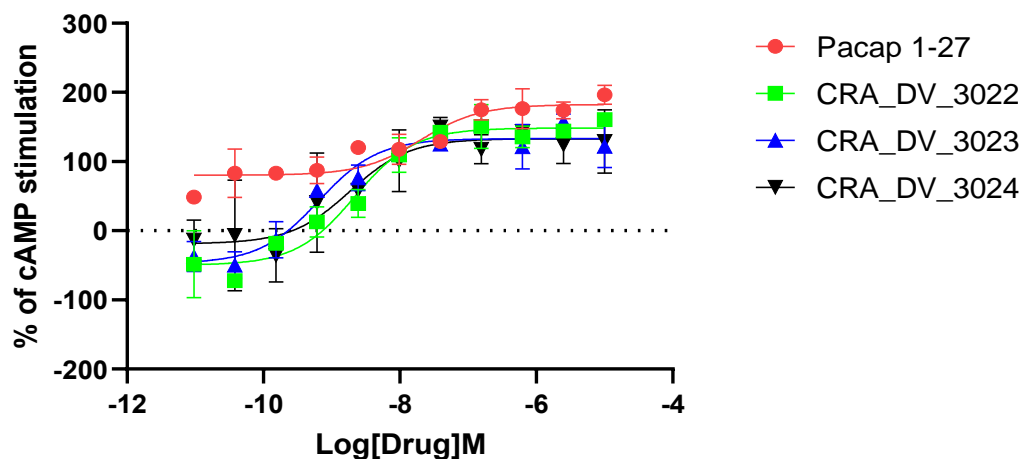

### CRA\_DV\_3025,3026 &3027 on PAC1-CHO; Agonist

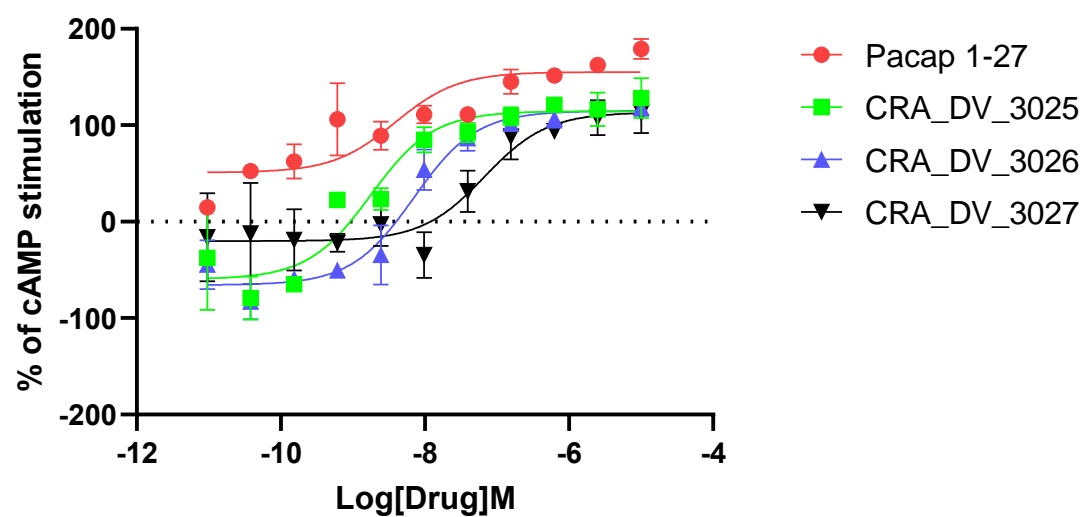

| <u>PAC1-CHO</u> | <u>Pacap1-27</u> | <u>CRA_DV_3022</u> | <u>CRA_DV_3023</u> | <u>CRA_DV_3024</u> | <u>VIPR1-CHO</u> | <u>Pacap1-27</u> | <u>CRA_DV_3025</u> | <u>CRA_DV_3026</u> | <u>CRA_DV_3027</u> |
|-----------------|------------------|--------------------|--------------------|--------------------|------------------|------------------|--------------------|--------------------|--------------------|
| EC50(nM)        | 20               | 2.1                | 0.6                | 1.8                | EC50(nM)         | 8.9              | 1.76               | 6.9                | 67                 |
| Emax(%)         | 100              | 68                 | 53                 | 52.65              | Emax(%)          | 100              | 57.6               | 58                 | 56.4               |
| R <sup>2</sup>  | 0.82             | 0.94               | 0.92               | 0.78               | R <sup>2</sup>   | 0.75             | 0.90               | 0.96               | 0.84               |

Cells: HA-PAC1-CHO Passage #31, (20.000/well) were plated in 3 ea. 96-well plate in DMEM:F12 (1:1)medium, incubated

24 hrs. Cells were serum-starved 4 hrs, then incubated with 500uM IBMX in Serum free media for 20 min. Then treated the cells with serial drug dilutions in vehicle (500uM IBMX in SF media) for 10 minutes incubation. Serial dilutions of different ligands started at 10 uM final concentration. The mixtures were then damped, and ice-cold assay buffer was added, plate was heated at 90 °C for 10 min. Plate was centrifuged at 4000 rpm for 10 min. at 4°C , then supernatant was transferred into a new 96-well plate. Supernatants were co-incubated with ~ 1 pmol of [3H]cAMP, 7 ug PKA in 0.05% BSA for 1 hr at RT. Data represent mean +/- SEM of a single experiment, carried out in duplicate.

### CRA\_DV\_3022,3023 &3024 on VPAC1-CHO; Agonist

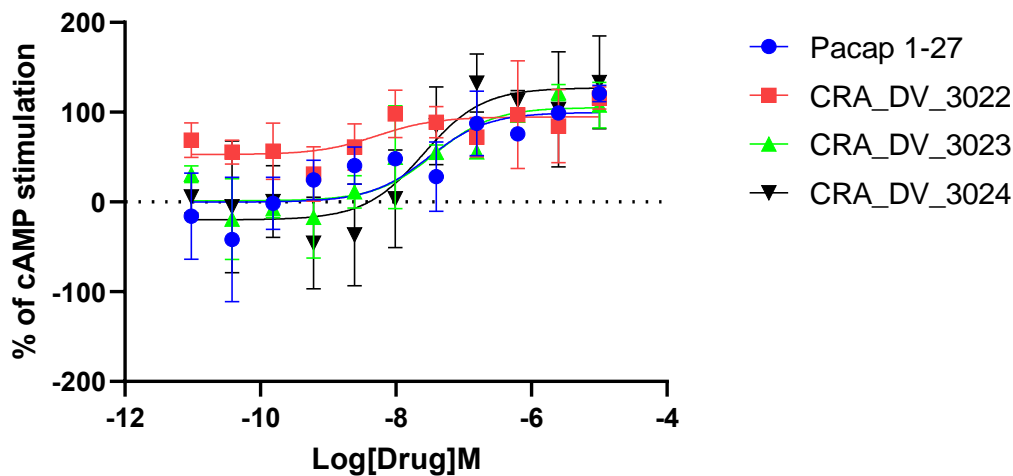

### CRA\_DV\_3025,3026 &3027 on VPAC1-CHO; Agonist

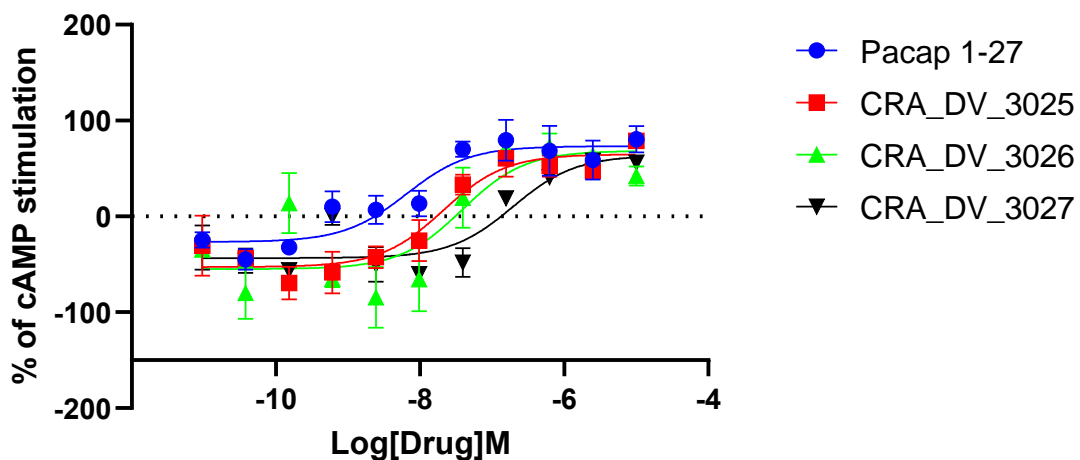

| VPAC1-CHO            | Pacap1-27 | CRA_DV_3022 | CRA_DV_3023 | CRA_DV_3024 | VPAC1-CHO            | Pacap1-27 | CRA_DV_3025 | CRA_DV_3026 | CRA_DV_3027 |
|----------------------|-----------|-------------|-------------|-------------|----------------------|-----------|-------------|-------------|-------------|
| EC50(nM)             | 30        | 5.2         | 36          | 25          | EC50(nM)             | 6.4       | 20          | 38          | 195         |
| E <sub>max</sub> (%) | 100       | 94          | 105         | 127         | E <sub>max</sub> (%) | 100       | 91.28       | 95.21       | 90.48       |
| R <sup>2</sup>       | 0.62      | 0.32        | 0.72        | 0.70        | R <sup>2</sup>       | 0.85      | 0.89        | 0.69        | 0.81        |

Cells: HA-VPAC1-CHO Passage #22, (20.000/well) were plated in 3 ea. 96-well plate in DMEM:F12 (1:1)medium, incubated

24 hrs. Cells were serum-starved 4 hrs, then incubated with 500uM IBMX in Serum free media for 20 min. Then treated the cells with serial drug dilutions in vehicle (500uM IBMX in SF media) for 10 minutes incubation. Serial dilutions of different ligands started at 10 uM final concentration. The mixtures were then damped, and ice-cold assay buffer was added, plate was heated at 90 °C for 10 min. Plate was centrifuged at 4000 rpm for 10 min. at 4°C , then supernatant was transferred into a new 96-well plate. Supernatants were co-incubated with ~ 1 pmol of [3H]cAMP, 7 ug PKA in 0.05% BSA for 1 hr at RT. Data represent mean +/- SEM of a single experiment, carried out in duplicate.

#### CRA\_DV\_3022,3023 &3024 on VPAC2-CHO; Agonist

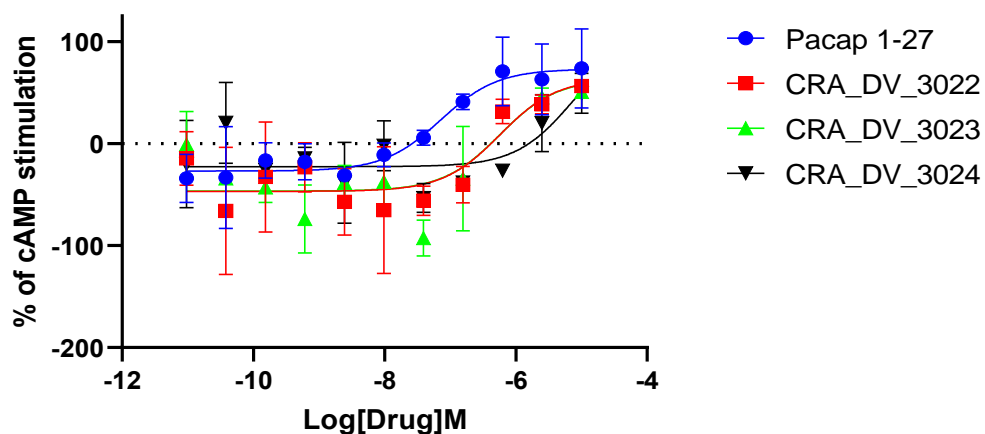

### CRA\_DV\_3025,3026 &3027 on VPAC2-CHO; Agonist

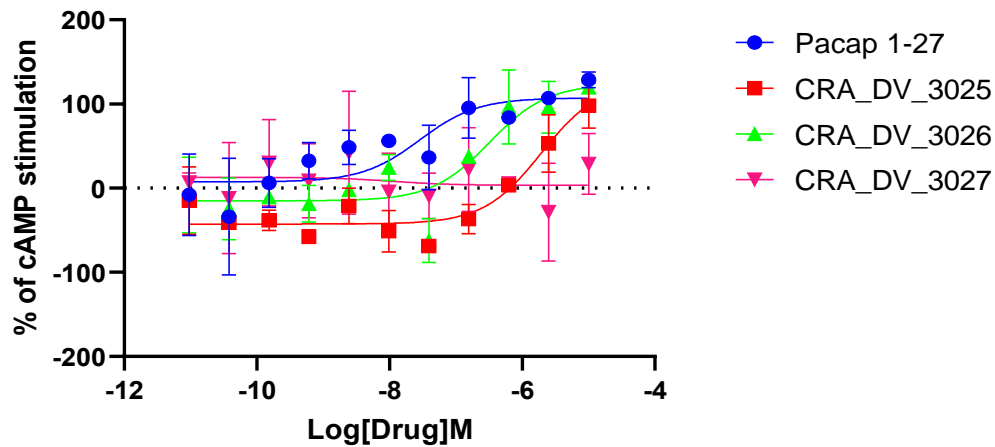

| VPAC2-CHO            | Pacap1-27 | CRA_DV_3022 | CRA_DV_3023 | CRA_DV_3024 | VPAC2-CHO            | Pacap1-27 | CRA_DV_3025 | CRA_DV_3026 | CRA_DV_3027 |
|----------------------|-----------|-------------|-------------|-------------|----------------------|-----------|-------------|-------------|-------------|
| EC50(nM)             | 71        | 576         | 577         | 7369        | EC50(nM)             | 28        | 1943        | 320         | NC          |
| E <sub>max</sub> (%) | 100       | 91          | 90.42       | 130         | E <sub>max</sub> (%) | 100       | 118         | 115         | NC          |
| R <sup>2</sup>       | 0.80      | 0.59        | 0.61        | 0.40        | R <sup>2</sup>       | 0.62      | 0.82        | 0.74        | NC          |

Cells: HA-VPAC2-CHO Passage #28, (20.000/well) were plated in 3 ea. 96-well plate in DMEM:F12 (1:1)medium, incubated

24 hrs. Cells were serum-starved 4 hrs, then incubated with 500uM IBMX in Serum free media for 20 min. Then treated the cells with serial drug dilutions in vehicle (500uM IBMX in SF media) for 10 minutes incubation. Serial dilutions of different ligands started at 10 uM final concentration. The mixtures were then damped, and ice-cold assay buffer was added, plate was heated at 90 °C for 10 min. Plate was centrifuged at 4000 rpm for 10 min. at 4°C , then supernatant were transferred into a new 96-well plate. Supernatants were co-incubated

with ~ 1 pmol of [3H]cAMP, 7 ug PKA in 0.05% BSA for 1 hr at RT. Data represent mean +/- SEM of a single experiment, carried out in duplicate.
